# Supplementary material for: Cr2TiC2-based double MXenes: novel 2D bipolar antiferromagnetic semiconductor with gate-controllable spin orientation toward antiferromagnetic spintronics
Source: Royal Society of Chemistry journal article supplement (doi:10.1039/c8nr07692h), 2018-11-27
Supplement: c8nr07692h1.pdf [file c8nr07692h1.pdf]

### Supporting Information

Cr<sub>2</sub>TiC<sub>2</sub>-based double MXenes: Novel 2D bipolar antiferromagnetic semiconductor with gate-controllable spin orientation towards antiferromagnetic spintronics

Junjie He<sup>\*,1,2</sup>, Guangqian Ding<sup>2</sup>, Chengyong Zhong<sup>1,2</sup>, Shuo Li<sup>3</sup>, Dengfeng Li<sup>2</sup>,  
Gang Zhang<sup>\*,4</sup>

<sup>1</sup>*Institute for Advanced Study, Chengdu University, Chengdu 610100, P. R. China*

<sup>2</sup>*School of Science, Chongqing University of Posts and Telecommunications, Chongqing 400065, P. R. China.*

<sup>3</sup>*Faculty of Science, Charles University in Prague, Hlavova 8, 128 43 Prague 2, Czech Republic.*

<sup>4</sup>*Institute of High Performance Computing, A\*STAR, Singapore 138632.*

# 1. The band structure of symmetrical functionalization of double MXenes

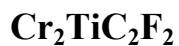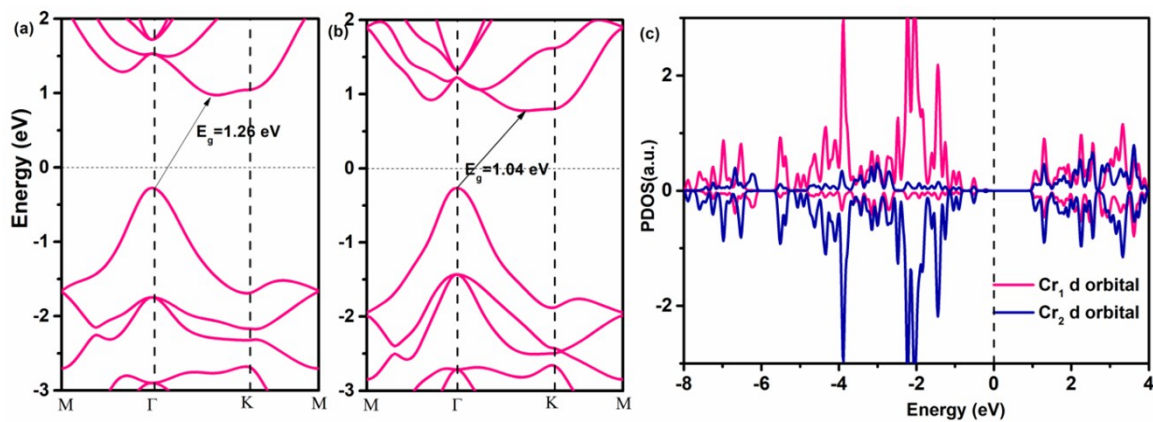

**Figure S1:** (a)  $\text{Cr}_2\text{TiC}_2\text{F}_2$  and (b)  $\text{Cr}_2\text{TiC}_2\text{Cl}_2$ . (c) The PDOS of  $d$  states are shown for the Cl-bonded ( $\text{Cr}_1$ ) and F-bonded ( $\text{Cr}_2$ ) Cr atoms in  $\text{Cr}_2\text{TiC}_2\text{F}_2$ , respectively. The Fermi level is set to zero.

## 2. Non-collinear magnetic structure.

The triangular spin lattice typically results in a frustration, which have been found in has been found in CrSe<sub>2</sub>.<sup>1</sup> Therefore, we consider a non-collinear AFM (NCAFM) configuration with the spin vectors of the nearest-neighboring Cr atoms at 120° to each other as one of possibility of the spin arrangement in Cr<sub>2</sub>TiC<sub>2</sub>FCl MXenes system in Figure S2. Luckily, by considering the spin-orbital coupling, our calculation indicate the AFM-c state as more stable, which gains  $E_{NCAFM/AFM-c} = E_{NCAFM} - E_{AFM-c} = 339$  meV over the described NCAFM phase. Furthermore, we calculate the magnetic anisotropy energy  $E_{MAE}$  between magnetic moment in plane and out of plane for the Cr<sub>2</sub>TiC<sub>2</sub>FCl MXenes, which defined by  $E_{MAE} = E_{in-plane} - E_{out-of-plane}$ , the  $E_{MAE}$  turns out to be positive and equal to 1.221 meV, indicating an out-of-plane orientation of magnetism moment. Thus, the Cr<sub>2</sub>TiC<sub>2</sub>FCl system shows the AFM-c ground states with out-of-plane magnetic anisotropy.

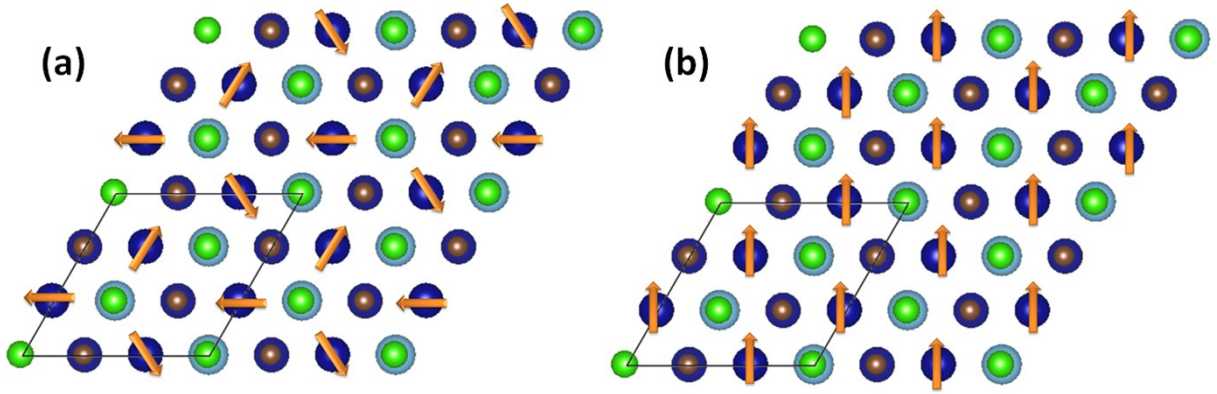

**Figure S2:** A 2D  $(\sqrt{3} \times \sqrt{3})R30^\circ$  cell is considered. (a) non-collinear AFM (NCAFM) configuration. (b) AFM-c configuration with SOC. The yellow arrows denote the different magnetic configuration. The arrow of magnetic moment in (b) are shown in  $xy$  plane for visualization purpose. (in fact, the arrow is always in out of plane under consideration)

### 3. The Atomic Model for Mixed functionalization $\text{Cr}_2\text{TiC}_2$ double MXenes

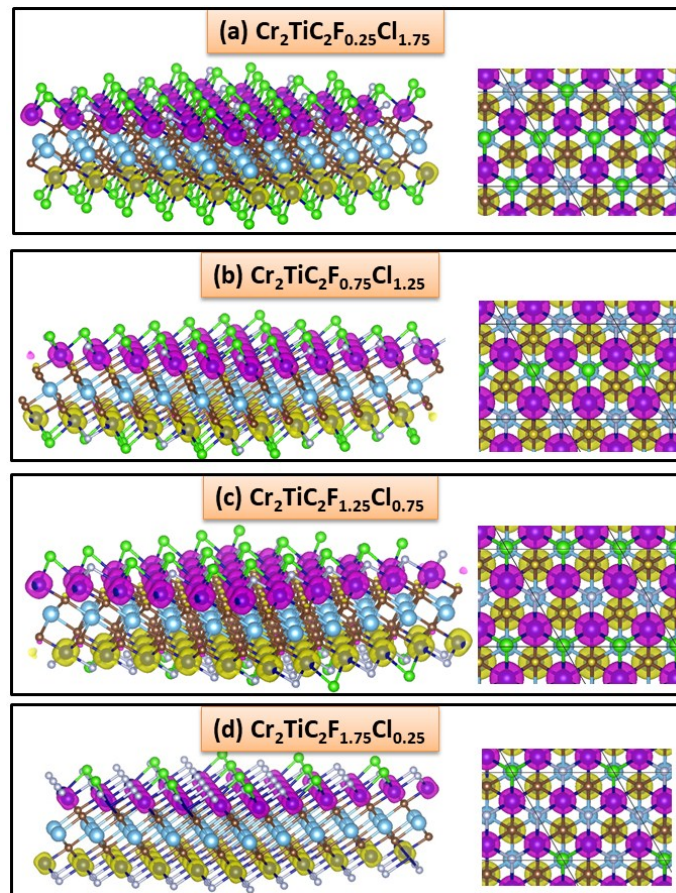

Figure S3: The various atomic model of  $\text{Cr}_2\text{TiC}_2\text{F}_x\text{Cl}_{2-x}$  systems,  $x=0.25$  (a),  $0.75$  (b),  $1.25$  (c),  $1.75$  (d) with spin-polarized charge density are considered. The blue and yellow colors represent the spin up and spin down spin-polarized charge densities, respectively. The iso-surface is set to  $0.03 \text{ e}/\text{\AA}^3$ .

#### Reference:

---

<sup>1</sup> H. Y. Lv *et al.* *Phys. Rev. B*, 2015, **92**(21), p.214419.
